# Supplementary material
Source: PubMed Central journal article supplement (PMC8115767)
Supplement: NIHMS1653412-supplement-Supp.pdf [file NIHMS1653412-supplement-Supp.pdf]

**SUPPLEMENTARY MATERIAL**

Proteogenomic analysis of Vascular Invasion in Hepatocellular Carcinoma (HCC)

Reveals Molecular Drivers and Predictive Biomarkers

## **SUPPLEMENTARY FIGURE LEGENDS**

### **Supplementary Figure 1 Upstream regulators of proteomic changes in vascular invasion.**

Top upstream transcriptional regulators of the proteomic changes in HCC with vascular invasion.

### **Supplementary Figure 2 Fibronectin protein mapping in LC/MS analysis of MYC-HCC**

Sequence coverage Map of mouse Fn1 in MYC-HCC tumor and liver tissue samples. a) Fibronectin sequence from N-terminus to C-terminus (left to right). Quantified peptides are indicated in orange and identified but not quantified (not identified in at least 20% of the samples) are indicated in blue. b) Quantified peptides for MYC-HCC tumor and liver tissue samples. Z-scores indicate the number of standard deviations that a peptide deviated from the average across all samples. Peptides with Z-score greater and less than zero are indicated in green and red respectively.

### **Supplementary Figure 3 Fibronectin protein expression in murine MYC-HCC tumor**

IHC for FN1 in MYC- HCC. The dotted line shows the tumor border with the surrounding liver. The brown staining indicated Fn1 expression. The bottom insert shows the FN1 cellular staining (60X) while the inserts in the top right demonstrate the stromal FN1 expression (60X).

### **Supplementary Figure 4 MYC promotes the transcription of FN1**

a. Multiple instances of MYC binding identified in the promoter regions of FN1 in the Gene transcription regulation database (GTRD) from ChIPseq analysis. b. Motif finding analysis of eukaryotic promoter database (EPD) identifies multiple MYC binding motifs (red boxes) in the promoter region of the human FN1 gene. c. Correlation of MYC and FN1 in multiple human cancers in the TCGA database.

### **Supplementary Figure 5: Fibronectin promotes invasiveness of SNU182 cells.**

Demonstration of FN1 knockdown in SNU182 cells transfected with scr siRNA or FN1 siRNA, using qPCR of. b. Schematic of basement membrane invasion assay and quantification of invaded SNU182 cells transfected with scr siRNA or FN1 siRNA.

### **Supplemental Figure 6: Fibronectin expression in human HCC tissue**

a. Correlation of fibronectin tissue protein expression in the human TCGA dataset with presence of vascular invasion, tumor grade and tumor stage. b. Impact of fibronectin mRNA protein expression in the human TCGA dataset with recurrence free survival.

### **Supplementary Figure 7: Validation of Fibronectin expression in human HCC**

Representative cores of HCC tissue with immunohistochemistry for fibronectin expression from the human cell pathology atlas (HCPA).

### **Supplementary Figure 8: Fibronectin expression in tumor thrombus**

Representative images of three human HCC tissues with vascular invasion showing IHC staining for fibronectin expression and HepPar1 in tumor emboli within vasculature.

## **SUPPLEMENTARY TABLES**

### **Supplementary Table 1**

Comparison of significantly mutated genes and somatic copy number variations between HCC with or without vascular invasion.

### **Supplementary Table 2**

Differentially expressed mRNA and microRNA between HCC with or without vascular invasion.

### **Supplementary Table 3**

Differentially expressed proteins between HCC with or without vascular invasion.

**Supplementary Figure 1: Top Upstream Regulators of VI-associated proteomic changes**

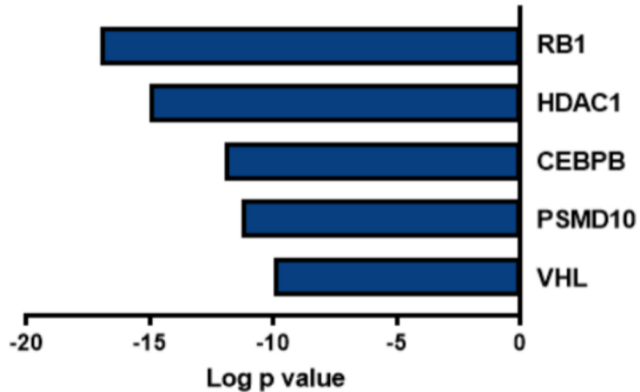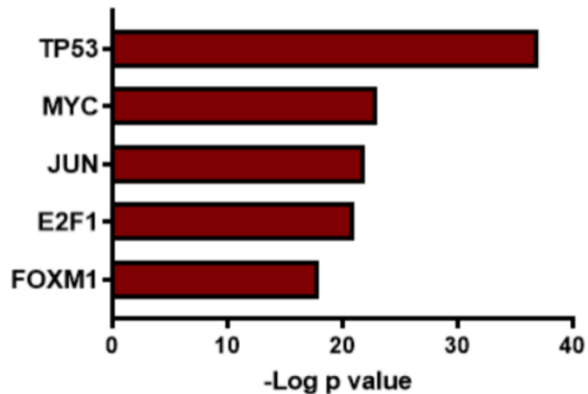

# Supplementary Figure 2: Fibronectin protein expression in murine MYC-HCC

a

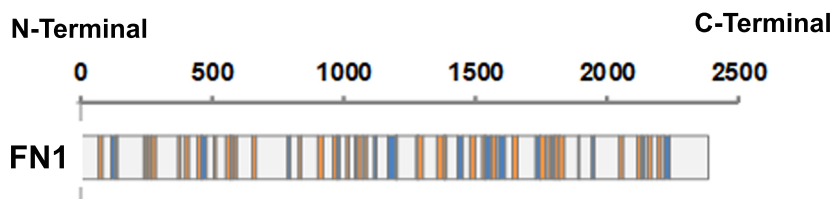

b

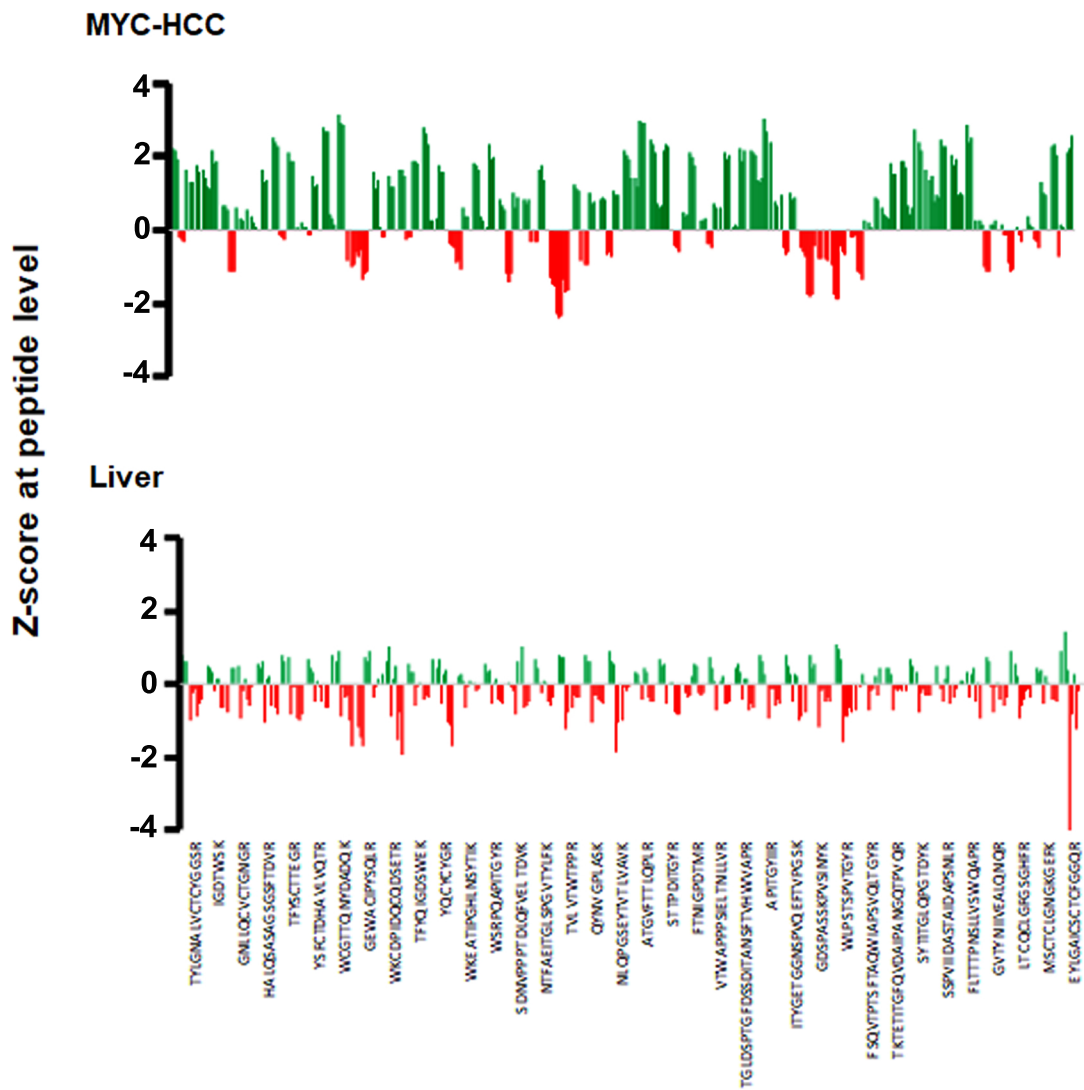

Supplementary Figure 3: Fibronectin expression in murine MYC-HCC

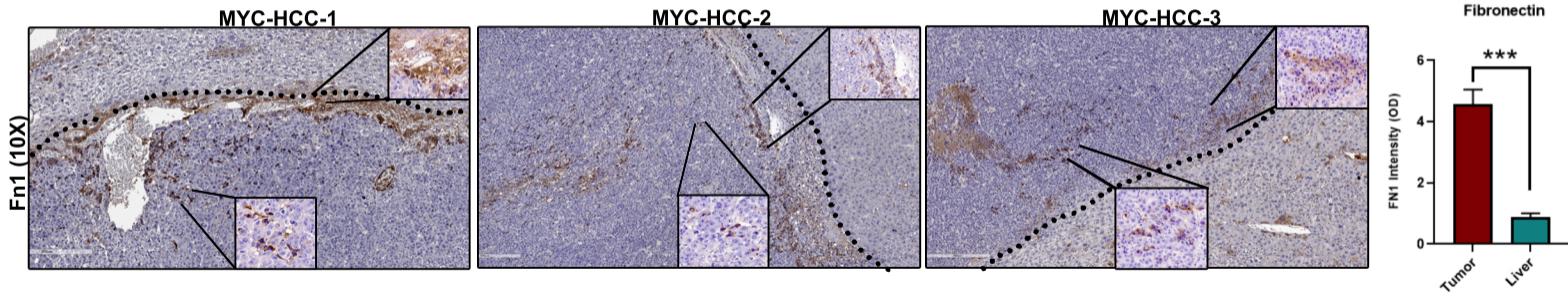

## Supplementary Figure 4: MYC promotes the transcription of Fibronectin

### a Gene Transcription Regulation database of Transcription Factor binding sites identified from ChIP-seq

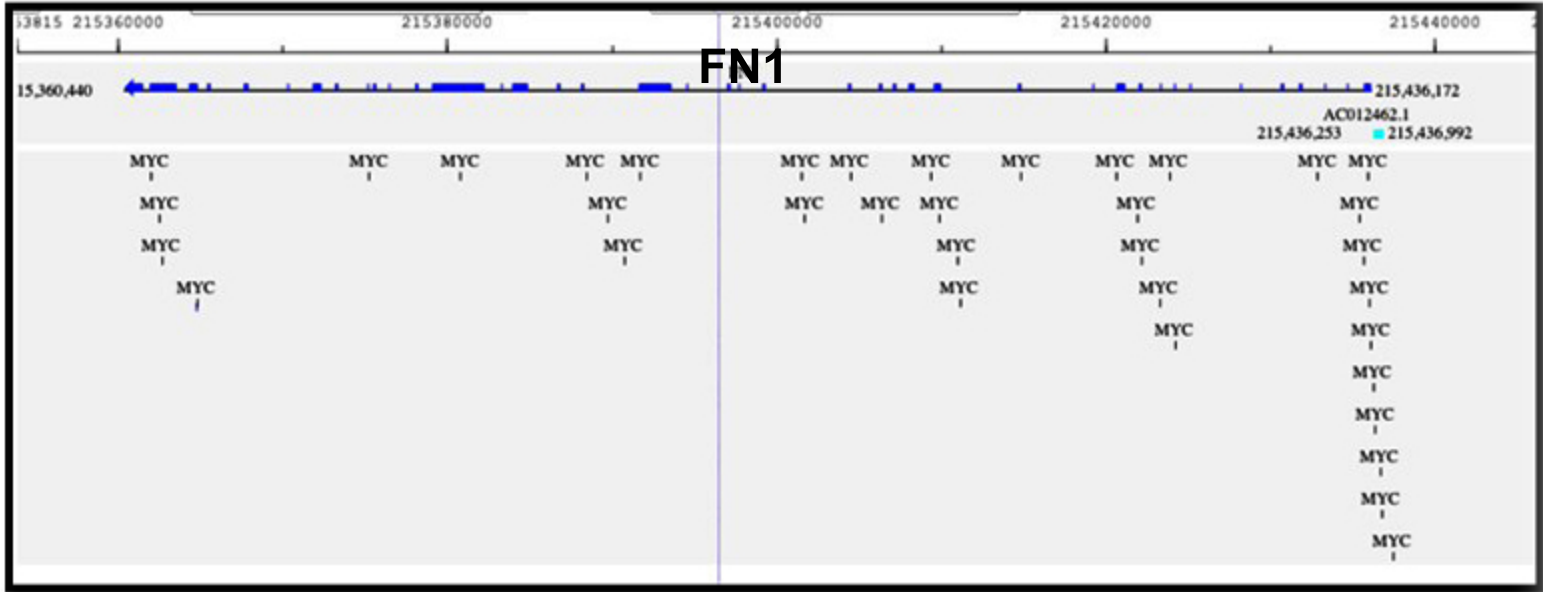

### b Eukaryotic promoter Database (EPD) MYC Motif Finding Tool

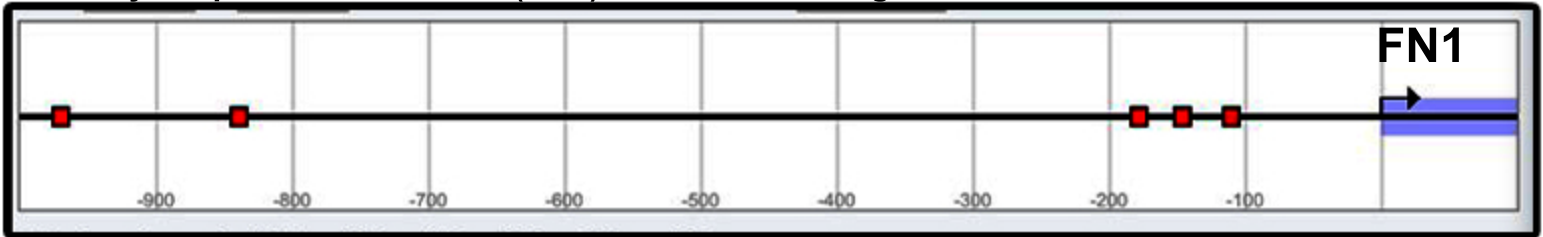

MYC (p=0.001): -116. -152. -184. -845, -976.

### c Significant correlation between MYC and FN1 across human cancers in TCGA

| Diseases or Studies                   | Sample number | Correlation coefficient (r) | p-value  |
|---------------------------------------|---------------|-----------------------------|----------|
| Kidney Clear Cell Carcinoma           | 603           | 0.4237                      | 1.13E-27 |
| Kidney Papillary Cell Carcinoma       | 321           | 0.393                       | 2.68E-13 |
| Glioblastoma Multiforme               | 171           | 0.4121                      | 2.13E-08 |
| Thyroid Carcinoma                     | 571           | 0.2317                      | 2.15E-08 |
| Pheochromocytoma & Paraganglioma      | 185           | 0.3919                      | 3.47E-08 |
| Kidney Chromophobe                    | 91            | 0.5355                      | 4.52E-08 |
| Adrenocortical Cancer                 | 77            | 0.5733                      | 5.04E-08 |
| Bladder Urothelial Carcinoma          | 426           | 0.2494                      | 1.84E-07 |
| Testicular Germ Cell Tumor            | 154           | 0.3684                      | 2.58E-06 |
| Sarcoma                               | 264           | 0.2431                      | 6.55E-05 |
| Liver Hepatocellular Carcinoma        | 421           | 0.1738                      | 3.41E-04 |
| Lung Adenocarcinoma                   | 574           | 0.1259                      | 2.52E-03 |
| Uterine Corpus Endometrioid Carcinoma | 204           | 0.1763                      | 1.17E-02 |



## Supplementary Figure 5: Fibronectin promotes invasiveness of SNU182

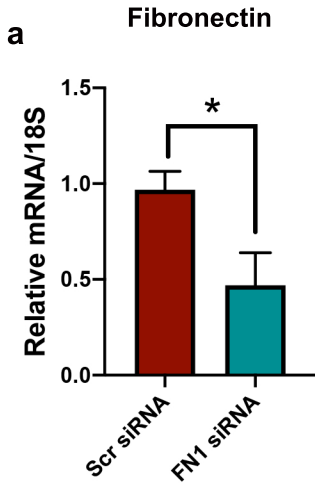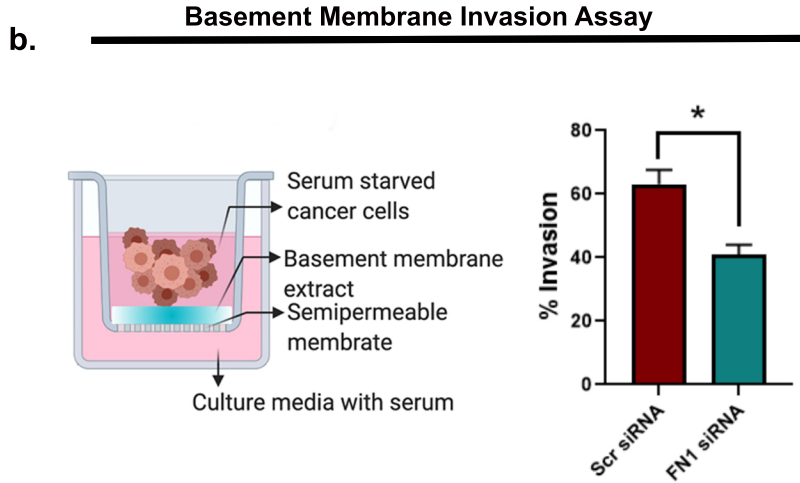

# Supplementary Figure 6: Fibronectin expression in human HCC

## a Fibronectin Tissue Protein Expression

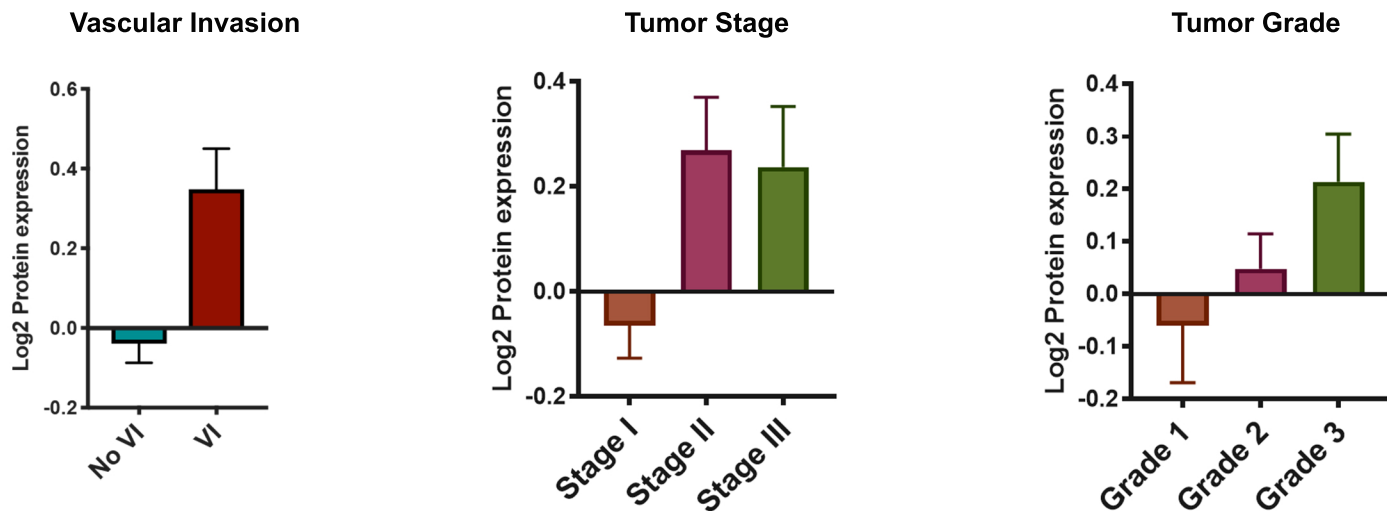

## b Fibronectin Tissue mRNA Expression

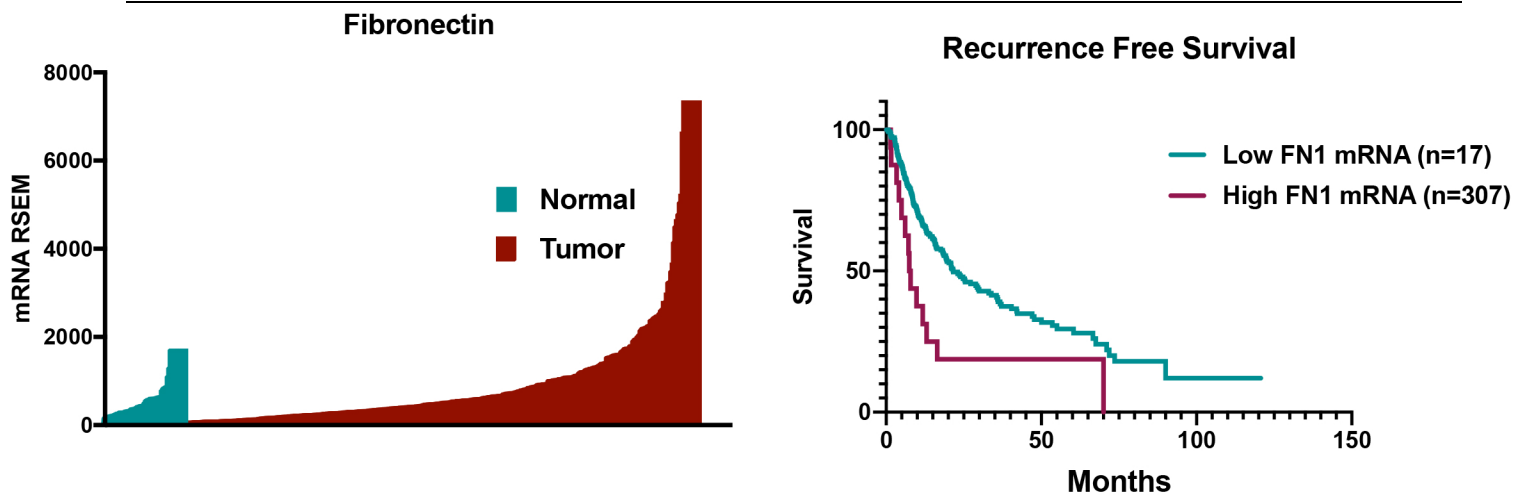

# Supplementary Figure 7: Fibronectin expression in HCPA repository

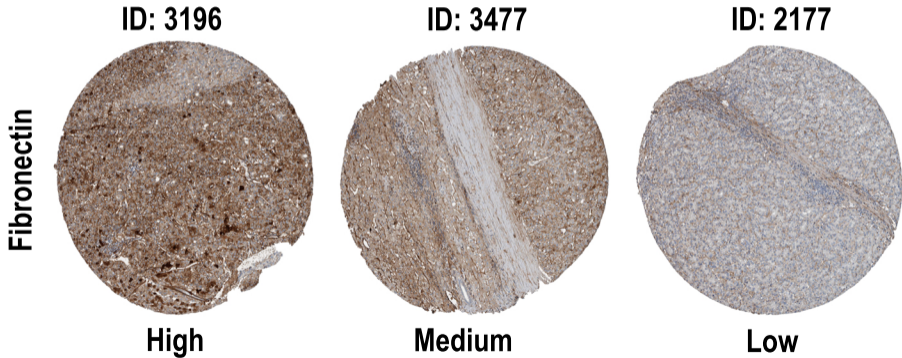

## Supplementary Figure 8: Fibronectin expression in tumor thrombus

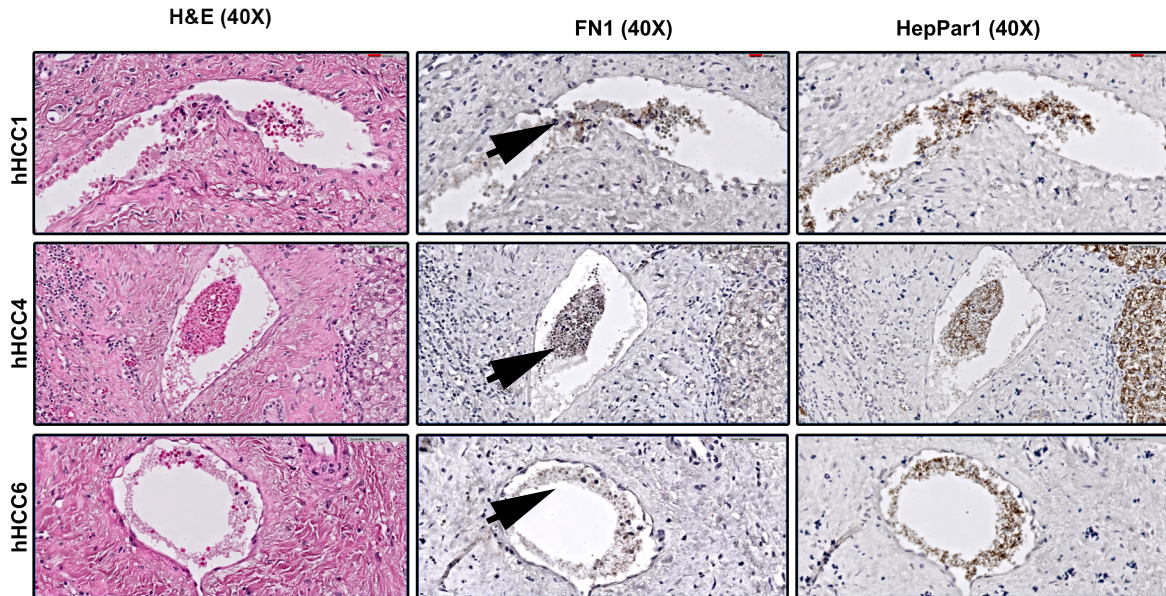

**Supplementary Table 1: Comparison of significantly mutated genes and somatic copy number variations between HCC with or without vascular invasion.**

| <b>Somatic Mutations</b>      |                                   |                                |                |
|-------------------------------|-----------------------------------|--------------------------------|----------------|
| <b>Gene</b>                   | <b>No Vascular Invasion n (%)</b> | <b>Vascular Invasion n (%)</b> | <b>p value</b> |
| TP53                          | 52 (25.6%)                        | 39 (37.5%)                     | <b>0.035</b>   |
| HIST1H1C                      | 1 (0.5%)                          | 5 (4.8%)                       | <b>0.018</b>   |
| AHCTF1                        | 6 (3.0%)                          | 7 (6.7%)                       | 0.139          |
| NFE2L2                        | 5 (2.5%)                          | 6 (5.8%)                       | 0.193          |
| CTNNB1                        | 52 (25.6%)                        | 33 (31.7%)                     | 0.282          |
| PIK3CA                        | 9 (4.4%)                          | 2 (1.9%)                       | 0.344          |
| RB1                           | 7 (3.4%)                          | 6 (5.8%)                       | 0.376          |
| AZIN1                         | 4 (2.0%)                          | 4 (3.8%)                       | 0.450          |
| EEF1A1                        | 8 (3.9%)                          | 2 (1.9%)                       | 0.504          |
| RPS6KA3                       | 7 (3.4%)                          | 5 (4.8%)                       | 0.548          |
| ARID2                         | 9 (4.4%)                          | 6 (5.8%)                       | 0.588          |
| ALB                           | 26 (12.8%)                        | 16 (15.4%)                     | 0.599          |
| BAP1                          | 10 (4.9%)                         | 7 (6.7%)                       | 0.599          |
| KRAS                          | 4 (2.0%)                          | 2 (1.9%)                       | 0.665          |
| CREB3L3                       | 4 (2.0%)                          | 1 (1.0%)                       | 0.665          |
| GPATCH4                       | 5 (2.5%)                          | 1 (1.0%)                       | 0.668          |
| APOB                          | 23 (11.3%)                        | 10 (9.6%)                      | 0.702          |
| CDKN2A                        | 7 (3.4%)                          | 2 (1.9%)                       | 0.723          |
| AXIN1                         | 15 (7.4%)                         | 8 (7.7%)                       | 1.000          |
| ARID1A                        | 14 (6.9%)                         | 7 (6.7%)                       | 1.000          |
| KEAP1                         | 10 (4.9%)                         | 5 (4.8%)                       | 1.000          |
| LZTR1                         | 6 (3.0%)                          | 3 (2.9%)                       | 1.000          |
| 1L6ST                         | 7 (3.4%)                          | 3 (2.9%)                       | 1.000          |
| RP1L1                         | 7 (3.4%)                          | 3 (2.9%)                       | 1.000          |
| ACVR2A                        | 6 (3.0%)                          | 3 (2.9%)                       | 1.000          |
| NRAS                          | 3 (1.5%)                          | 2 (1.9%)                       | 1.000          |
| <b>Copy Number Variations</b> |                                   |                                |                |
| <b>Gene</b>                   | <b>No Vascular Invasion n (%)</b> | <b>Vascular Invasion n (%)</b> | <b>p value</b> |
| CCND1                         | 14 (7%)                           | 7 (6.7%)                       | 0.154          |
| FGF19                         | 11 (5.5%)                         | 6 (5.7%)                       | 0.108          |
| MYC                           | 40 (19.9%)                        | 17 (16.2%)                     | 0.515          |
| MET                           | 5 (2.5%)                          | 6 (5.7%)                       | 0.151          |

|        |            |            |       |
|--------|------------|------------|-------|
| VEGFA  | 17 (8.5%)  | 6 (5.7%)   | 0.066 |
| MCL1   | 21 (10.4%) | 15 (14.3%) | 0.838 |
| TERT   | 13 (6.5%)  | 7 (6.7%)   | 0.941 |
| RB1    | 15 (7.5%)  | 7 (6.7%)   | 0.701 |
| CDKN2A | 10 (5.0%)  | 7 (6.7%)   | 0.113 |
| ERRFI1 | 7 (3.5%)   | 4 (3.8%)   | 0.108 |
| NCOR1  | 4 (2.0%)   | 5 (4.8%)   | 0.187 |

**Supplementary Table 2 Differentially expressed mRNA and microRNA between HCC with or without vascular invasion.**

| mRNA Differential Expression in HCC with Vascular Invasion |                  |            |
|------------------------------------------------------------|------------------|------------|
| ID                                                         | Adjusted p-value | Difference |
| GTF2F2                                                     | 0.000002         | 74.5       |
| ENGASE                                                     | 0.000008         | 151.3      |
| RCCD1                                                      | 0.000013         | 71.4       |
| C12orf47                                                   | 0.000025         | 79.1       |
| LOC80154                                                   | 0.000028         | 119.6      |
| FLJ35024                                                   | 0.000030         | 2.2        |
| ZNF391                                                     | 0.000031         | 7.1        |
| OAZ2                                                       | 0.000035         | -342.6     |
| ZNF681                                                     | 0.000054         | 29.7       |
| EXOSC8                                                     | 0.000054         | 66.3       |
| NUDT15                                                     | 0.000064         | 70.4       |
| ZMYND8                                                     | 0.000069         | 134.6      |
| JMJD6                                                      | 0.000072         | 164.4      |
| CENPJ                                                      | 0.000077         | 43.4       |
| EEF1E1                                                     | 0.000089         | 79.6       |
| CTHRC1                                                     | 0.000090         | 203.9      |
| COG1                                                       | 0.000097         | 123.2      |
| ZNF137                                                     | 0.000136         | 11.6       |
| FAM24B                                                     | 0.000143         | 7.5        |
| CNFN                                                       | 0.000145         | 25.9       |
| C12orf27                                                   | 0.000161         | 46.2       |
| TARS                                                       | 0.000166         | 395.8      |
| PTPDC1                                                     | 0.000178         | 21.7       |
| DSCR9                                                      | 0.000182         | 1.2        |
| DDIT3                                                      | 0.000199         | 342.7      |
| SLC1A7                                                     | 0.000202         | 270.0      |
| HOXC6                                                      | 0.000205         | 19.9       |
| ALDH8A1                                                    | 0.000213         | -865.9     |
| WDR4                                                       | 0.000225         | 67.9       |
| EFNA3                                                      | 0.000259         | 59.4       |
| TMPRSS6                                                    | 0.000264         | -2210.3    |
| ZNF85                                                      | 0.000273         | 17.0       |
| C5orf34                                                    | 0.000285         | 14.7       |

|          |          |         |
|----------|----------|---------|
| OTUD3    | 0.000304 | 30.2    |
| VPS45    | 0.000305 | 123.6   |
| FAM104A  | 0.000308 | 85.6    |
| APLNR    | 0.000309 | -275.9  |
| DHX37    | 0.000312 | 101.8   |
| SKA1     | 0.000319 | 65.0    |
| FAM64A   | 0.000321 | 27.8    |
| C4orf19  | 0.000327 | -196.5  |
| PROZ     | 0.000350 | -251.3  |
| CSTL1    | 0.000351 | 2.0     |
| AAAS     | 0.000362 | 106.7   |
| F9       | 0.000375 | -2719.8 |
| DUSP15   | 0.000382 | 22.0    |
| GPC4     | 0.000385 | 180.7   |
| PLEKHA9  | 0.000386 | 15.6    |
| SLC25A19 | 0.000391 | 59.9    |
| ZNF273   | 0.000392 | 14.4    |
| TMC5     | 0.000392 | 287.1   |
| TMPRSS3  | 0.000401 | 244.5   |
| HGS      | 0.000425 | 461.4   |
| FLJ35776 | 0.000429 | 57.0    |
| WDR75    | 0.000430 | 94.1    |
| ZNF408   | 0.000437 | 94.0    |
| TRIM7    | 0.000447 | 24.7    |
| CDC25B   | 0.000467 | 458.0   |
| ATF4     | 0.000471 | 1432.2  |
| PYCR1    | 0.000471 | 502.6   |
| CRIP3    | 0.000481 | 79.2    |
| EPRS     | 0.000508 | 489.8   |
| CDC20    | 0.000520 | 246.2   |
| MX2      | 0.000522 | 119.2   |
| C13orf23 | 0.000535 | 77.0    |
| ZNF738   | 0.000549 | 22.6    |
| UTP6     | 0.000550 | 113.7   |
| ZNF389   | 0.000550 | 4.3     |
| ZNF208   | 0.000572 | 43.9    |



|           |          |        |
|-----------|----------|--------|
| ERBB2     | 0.000584 | -944.9 |
| ZNF204P   | 0.000613 | 38.9   |
| RALA      | 0.000629 | 130.8  |
| KRTAP5-7  | 0.000645 | 2.9    |
| C2orf27A  | 0.000662 | 7.1    |
| XPOT      | 0.000680 | 345.6  |
| HOXD9     | 0.000703 | 34.4   |
| ZNF193    | 0.000721 | 28.7   |
| INO80C    | 0.000721 | 101.2  |
| GGPS1     | 0.000742 | 98.0   |
| SPATA1    | 0.000743 | -1.6   |
| PCDHA1    | 0.000746 | 83.9   |
| PA2G4     | 0.000780 | 556.8  |
| B3GNTL1   | 0.000797 | 73.1   |
| DDX54     | 0.000798 | 286.5  |
| ZNF296    | 0.000805 | 18.7   |
| ANAPC7    | 0.000815 | 134.2  |
| LOC440356 | 0.000825 | 2.6    |
| LOC399815 | 0.000842 | 2.6    |
| CCNC      | 0.000853 | -246.4 |
| LPCAT1    | 0.000859 | 613.2  |
| WASH7P    | 0.000868 | 266.2  |
| TIGD7     | 0.000869 | 37.2   |
| WASH5P    | 0.000881 | 57.6   |
| FAM27C    | 0.000882 | 17.0   |
| GAS5      | 0.000891 | 908.5  |
| C17orf90  | 0.000905 | 170.4  |
| CBX8      | 0.000907 | 66.0   |
| NAT9      | 0.000949 | 165.4  |
| AKAP8L    | 0.000959 | 175.8  |
| SIRT7     | 0.000980 | 122.3  |
| FARSB     | 0.000989 | 136.9  |
| IQCD      | 0.000995 | 15.2   |

**Micro RNA Differential Expression in HCC with Vascular Invasion**

| ID          | Adjusted p-value | Difference |
|-------------|------------------|------------|
| hsa-mir-122 | 0.0158           | -4399.4    |

|                 |        |         |
|-----------------|--------|---------|
| hsa-mir-100     | 0.0295 | -1598.2 |
| hsa-let-7a-2    | 0.0374 | -1539.3 |
| hsa-let-7a-3    | 0.0389 | -766.9  |
| hsa-let-7a-1    | 0.0405 | -757.8  |
| hsa-mir-126     | 0.0437 | -685.0  |
| hsa-let-7c      | 0.0444 | -399.8  |
| hsa-mir-27b     | 0.0419 | -276.4  |
| hsa-mir-23b     | 0.0154 | -222.3  |
| hsa-let-7g      | 0.0237 | -99.9   |
| hsa-mir-152     | 0.0045 | -77.0   |
| hsa-mir-139     | 0.0392 | -28.4   |
| hsa-mir-378c    | 0.0092 | -6.9    |
| hsa-mir-24-1    | 0.0236 | -4.7    |
| hsa-mir-1538    | 0.0267 | -0.1    |
| hsa-mir-3152    | 0.0096 | -0.1    |
| hsa-mir-3622a   | 0.0250 | -0.1    |
| hsa-mir-133a-2  | 0.0395 | 0.0     |
| hsa-mir-623     | 0.0271 | 0.0     |
| hsa-mir-3650    | 0.0071 | 0.0     |
| hsa-mir-548aa-2 | 0.0215 | 0.0     |
| hsa-mir-320b-1  | 0.0087 | 0.0     |
| hsa-mir-548u    | 0.0016 | 0.0     |
| hsa-mir-3675    | 0.0090 | 0.0     |
| hsa-mir-448     | 0.0422 | 0.0     |
| hsa-mir-1290    | 0.0419 | 0.0     |
| hsa-mir-3910-2  | 0.0345 | 0.0     |
| hsa-mir-1246    | 0.0101 | 0.0     |
| hsa-mir-548a-3  | 0.0289 | 0.0     |
| hsa-mir-1243    | 0.0305 | 0.0     |
| hsa-mir-1264    | 0.0421 | 0.1     |
| hsa-mir-3150    | 0.0077 | 0.1     |
| hsa-mir-3684    | 0.0069 | 0.1     |
| hsa-mir-1537    | 0.0022 | 0.1     |
| hsa-mir-1250    | 0.0386 | 0.1     |
| hsa-mir-3680    | 0.0146 | 0.1     |
| hsa-mir-3941    | 0.0242 | 0.1     |

|                |        |         |
|----------------|--------|---------|
| hsa-mir-3691   | 0.0116 | 0.2     |
| hsa-mir-488    | 0.0403 | 0.2     |
| hsa-mir-3136   | 0.0142 | 0.2     |
| hsa-mir-1254   | 0.0029 | 0.2     |
| hsa-mir-3651   | 0.0253 | 0.3     |
| hsa-mir-934    | 0.0319 | 0.3     |
| hsa-mir-34b    | 0.0163 | 0.4     |
| hsa-mir-1912   | 0.0063 | 0.4     |
| hsa-mir-3660   | 0.0363 | 0.5     |
| hsa-mir-3127   | 0.0496 | 0.6     |
| hsa-mir-642a   | 0.0404 | 0.7     |
| hsa-mir-550a-1 | 0.0166 | 0.7     |
| hsa-mir-548y   | 0.0076 | 0.7     |
| hsa-mir-212    | 0.0352 | 0.7     |
| hsa-mir-9-3    | 0.0251 | 0.8     |
| hsa-mir-1298   | 0.0047 | 0.9     |
| hsa-mir-1270-1 | 0.0112 | 1.0     |
| hsa-mir-1270-2 | 0.0125 | 1.1     |
| hsa-mir-942    | 0.0461 | 1.1     |
| hsa-mir-616    | 0.0482 | 1.6     |
| hsa-mir-1911   | 0.0066 | 2.3     |
| hsa-mir-301a   | 0.0484 | 2.6     |
| hsa-mir-34c    | 0.0200 | 2.7     |
| hsa-mir-1180   | 0.0201 | 8.8     |
| hsa-mir-423    | 0.0227 | 21.0    |
| hsa-mir-629    | 0.0076 | 23.2    |
| hsa-mir-15a    | 0.0289 | 29.7    |
| hsa-mir-452    | 0.0163 | 85.6    |
| hsa-mir-582    | 0.0045 | 119.3   |
| hsa-mir-223    | 0.0298 | 122.3   |
| hsa-mir-9-2    | 0.0084 | 504.1   |
| hsa-mir-9-1    | 0.0086 | 505.5   |
| hsa-mir-21     | 0.0061 | 35419.3 |

**Supplementary Table 3 Differentially expressed proteins between HCC with or without vascular invasion.**

| NAME            | p-value     | q-value     | Log2 Fold change |
|-----------------|-------------|-------------|------------------|
| Fibronectin     | 0.000156061 | 0.006454424 | 1.31             |
| PAI-1           | 0.002965332 | 0.013311046 | 1.31             |
| PEA15_pS116     | 0.006283621 | 0.021513413 | 1.22             |
| Ku80            | 0.003757161 | 0.015178929 | 1.14             |
| ERK2            | 0.001476784 | 0.009227338 | 1.13             |
| C Raf           | 0.00296315  | 0.013311046 | 1.13             |
| Smad3           | 0.00045974  | 0.006454424 | 1.12             |
| PEA15           | 0.001553116 | 0.009227338 | 1.12             |
| Smac            | 0.004687466 | 0.017865438 | 1.12             |
| AMPK_alpha      | 0.005687312 | 0.020155034 | 1.12             |
| 4E BP1_pT20     | 0.0008379   | 0.006863774 | 1.11             |
| Bax             | 0.001412655 | 0.009205043 | 1.11             |
| S6              | 0.002687144 | 0.0132391   | 1.11             |
| 4EBP1_pT37_T46  | 0.018193405 | 0.046371851 | 1.11             |
| YB1             | 0.019067075 | 0.046970112 | 1.11             |
| Bim             | 0.005294348 | 0.019444696 | 1.1              |
| VEGFR2          | 0.013498676 | 0.037871285 | 1.1              |
| 4E-BP1_pS65     | 0.000482863 | 0.006454424 | 1.09             |
| LKB1            | 0.000899383 | 0.006863774 | 1.09             |
| eEF2            | 0.012529766 | 0.036681345 | 1.09             |
| RBM15           | 0.012946087 | 0.03702472  | 1.09             |
| TSC1            | 0.019835649 | 0.047700014 | 1.09             |
| 14-3-3_zeta     | 0.021387717 | 0.049658838 | 1.09             |
| Annexin_VII     | 0.001291842 | 0.008698406 | 1.08             |
| Rictor_pT1135   | 0.002393188 | 0.012700725 | 1.08             |
| Bid             | 0.003033903 | 0.013322791 | 1.08             |
| GSK3-alpha-beta | 0.007297236 | 0.024164616 | 1.08             |
| Raptor          | 0.00772864  | 0.024780717 | 1.08             |
| PI3K-p85        | 0.018365089 | 0.046371851 | 1.08             |
| Collagen_VI     | 0.020150637 | 0.047887396 | 1.08             |
| HER3_pY1289     | 0.002346162 | 0.012700725 | 1.07             |
| NF2             | 0.007466903 | 0.024327652 | 1.07             |
| YAP             | 0.002947793 | 0.013311046 | 1.06             |
| PDK1_pS241      | 0.017925317 | 0.046371851 | 1.06             |

|                   |             |             |      |
|-------------------|-------------|-------------|------|
| 4EBP1             | 0.020635641 | 0.048469761 | 1.06 |
| PDK1              | 0.00245212  | 0.012700725 | 1.05 |
| IRS1              | 0.012338773 | 0.036653414 | 1.05 |
| ciAP              | 0.00842476  | 0.026590647 | 1.04 |
| Stathmin          | 0.010623641 | 0.03251478  | 1.04 |
| YB1_pS102         | 0.019603407 | 0.047700014 | 1.04 |
| EGFR_pY1173       | 0.014966938 | 0.040310952 | 1.03 |
| ADAR1             | 0.017129215 | 0.044936381 | 1.03 |
| Chk1_pS345        | 0.01901539  | 0.046970112 | 0.97 |
| Notch1            | 0.003311756 | 0.013936973 | 0.96 |
| 14-3-3_epsilon    | 0.014928847 | 0.040310952 | 0.96 |
| FOXO3a_pS318_S321 | 0.000676782 | 0.006454424 | 0.95 |
| PKC delta_pS664   | 0.001537112 | 0.009227338 | 0.95 |
| ACVRL1            | 0.002545762 | 0.012856097 | 0.95 |
| p27               | 0.003282489 | 0.013936973 | 0.95 |
| PR                | 0.004190262 | 0.016549346 | 0.95 |
| HER2_pY1248       | 0.012136428 | 0.036590424 | 0.95 |
| cJun_pS73         | 0.005545778 | 0.020004415 | 0.94 |
| ARaf_pS299        | 0.006737936 | 0.022684386 | 0.94 |
| STAT3_pY705       | 0.000645392 | 0.006454424 | 0.93 |
| mTOR_pS2448       | 0.000269827 | 0.006454424 | 0.93 |
| Beclin            | 0.002882264 | 0.013311046 | 0.93 |
| FoxM1             | 0.0057912   | 0.020169352 | 0.93 |
| Akt               | 0.014234861 | 0.039389616 | 0.93 |
| p90RSK_pT359_S363 | 0.000877583 | 0.006863774 | 0.92 |
| PARP_cleaved      | 0.001992947 | 0.011502149 | 0.92 |
| CD31              | 0.00369182  | 0.015178929 | 0.92 |
| Tuberin_pT1462    | 0.005214248 | 0.019444696 | 0.92 |
| SCD1              | 0.008691526 | 0.027010588 | 0.92 |
| TTF1              | 0.000702957 | 0.006454424 | 0.91 |
| Chk1              | 0.004260228 | 0.016549346 | 0.91 |
| GSK3_pS9          | 0.013013639 | 0.03702472  | 0.91 |
| SF2               | 0.000677749 | 0.006454424 | 0.9  |
| Snail             | 0.000677479 | 0.006454424 | 0.9  |
| p70S6K_pT389      | 0.000557078 | 0.006454424 | 0.9  |
| Bcl2              | 0.000211847 | 0.006454424 | 0.9  |

|                 |             |             |      |
|-----------------|-------------|-------------|------|
| Rad51           | 0.000951414 | 0.006863774 | 0.89 |
| XBP1            | 0.000817714 | 0.006863774 | 0.89 |
| c Met           | 0.002233519 | 0.012532521 | 0.89 |
| PREX1           | 0.0000294   | 0.002973207 | 0.88 |
| Annexin_1       | 0.000330374 | 0.006454424 | 0.88 |
| INPP4B          | 0.000147511 | 0.006454424 | 0.88 |
| MSH2            | 0.000640662 | 0.006454424 | 0.87 |
| EGFR_pY1068     | 0.000526732 | 0.006454424 | 0.87 |
| Src_pY416       | 0.00032104  | 0.006454424 | 0.87 |
| VHL             | 0.016017704 | 0.042573371 | 0.87 |
| ER alpha        | 0.000606394 | 0.006454424 | 0.86 |
| FOXO3a          | 0.000454781 | 0.006454424 | 0.86 |
| JAB1            | 0.000947978 | 0.006863774 | 0.86 |
| p53             | 0.001123584 | 0.007826346 | 0.86 |
| ARHI            | 0.000685413 | 0.006454424 | 0.85 |
| MAPK_pT202_Y204 | 0.0000228   | 0.002973207 | 0.84 |
| Akt_pS473       | 0.000213226 | 0.006454424 | 0.84 |
